# Supplementary material
Source: publisher site journal article supplement (https://www.dovepress.com/article/398509)
Supplement: Supplementary file 1 [file get_supplementary_file.php]

**Supplemental Materials**

Table S1: Cohort Terminology

| **COHORT** | **TERMINOLOGY** | **DEFINITION** | **OUTCOMES** |
| --- | --- | --- | --- |
| Cohort 1 | PD Patients | This is the population of patients with a Parkinson’s diagnosis. They are also the full-time employee and insurance subscriber. | Baseline characteristics, work loss and indirect costs, direct costs and HCRU |
| Cohort 2 | Caregiving Spouses | This is the population of spouses who may be providing care for the PD patients. They are the full-time employee and insurance subscriber. | Baseline characteristics, work loss and indirect costs |
| Cohort 3 | PD Spouses | This population has a Parkinson’s diagnosis and are also the **spouses** of the full-time employee and insurance subscriber. | Direct costs and HCRU |

Table S2: Generic Names for Parkinson’s Disease Medications

| **Generic Name** | **Drug Class** |
| --- | --- |
| levodopa1,2,3 | levodopa |
| apomorphine1,2 | dopamine agonists |
| bromocriptine2 |
| cabergoline2 |
| dihydroergocryptine (DHEC)2 |
| pergolide2 |
| piribedil2,3 |
| pramipexole1,2,3 |
| ropinirole1,2 |
| rotigotine1,2 |
| rasagiline1,2,3 | monoamine oxidase B (MAO-B) inhibitors |
| safinamide1 |
| selegiline1,2,3 |
| zonisamide2 |
| entacapone1,2 | catechol O-methyltransferase (COMT) inhibitors |
| opicapone1,2 |
| tolcapone1,2 |
| benztropine1 | anticholinergics |
| trihexyphenidyl1 |
| amantadine1,2 (class = adamantanes) | others |
| cannibidiol2 (class = cannabinoids) |
| clozapine2,3 (class = antipsychotics) |
| donepezil2,3 (class = cholinesterase inhibitors) |
| galantamine3 (class = cholinesterase inhibitors) |
| istradefylline2 (class = adenosine receptor antagonists) |
| levetiracetam3 (class = anticonvulsants) |
| memantine2,3 (class = N-methyl D-aspartate receptor (NMDAR) antagonists) |
| methylphenidate2 (class = stimulants) |
| modafinil3 (class = wakefulness promoting agents) |
| oxycodone-nalaxone3 (class = opioid analgesics) |
| quetiapine3 (class = antipsychotics) |
| rivastigmine2,3 (class = cholinesterase inhibitors) |
| pimavanserin3 (class = antipsychotics) |

1 Mayo Clinic. *Parkinson’s disease.* Retrieved from: https://www.mayoclinic.org/diseases-conditions/parkinsons-disease/diagnosis-treatment/drc-20376062. Accessed November 7, 2022.

2 Fox SH, Katzenschlager R, Lim SY et al. Movement Disorder Society Evidence-Based Medicine Committee. International Parkinson and movement disorder society evidence-based medicine review: Update on treatments for the motor symptoms of Parkinson's disease. *Mov Disord.* 2018 Aug;33(8):1248-1266.

3 Seppi K, Ray Chaudhuri K, Coelho M et al. The collaborators of the Parkinson's Disease Update on Non-Motor Symptoms Study Group on behalf of the Movement Disorders Society Evidence-Based Medicine Committee. Update on treatments for nonmotor symptoms of Parkinson's disease-an evidence-based medicine review. *Mov Disord.* 2019 Feb;34(2):180-198.

Note: Some drugs listed in Seppi et al only were excluded because they treat non-motor symptoms of PD that are common in the general population (such as depression, insomnia, orthostatic hypotension, sexual dysfunction, constipation, etc.) and thus have a lower likelihood of being Parkinson’s related.

Figure S1: PD Patient and Caregiving Spouse Attrition for Absence Analysis

**Parkinson’s Patient Attrition**

**Caregiving Spouse’s Attrition**

Full-time employees eligible for **ABS** ≥3 years before and ≥3 year after index date and no evidence of pregnancy

N = 104

Continuous enrollment with medical and pharmacy benefits ≥3 years before and ≥1 year after the index date without any claims for PD during the pre-index period

N = 1,933

Patients in MarketScan® Commercial database linked to the HPM database, aged 18-64, with ≥2 non-diagnostic claims ≥6 months apart, with a diagnosis code for PD during study period (earliest diagnosis = index date)

N = 4,812

Full-time employees eligible for **ABS** ≥3 years before and ≥3 year after index date, and no evidence of PD or pregnancy

N = 45

Employees aged 18-64 identified as a spouse of the PD patient (identified above), with continuous enrollment in medical and pharmacy benefits ≥3 years before and ≥1 year after the index date

N = 2,014

Continuous enrollment with medical and pharmacy benefits ≥3 years before and ≥1 year after index date without any claims for PD during the pre-index period

N = 7,533

Patients in MarketScan® Commercial database linked to the HPM database, aged 18-64, with ≥2 non-diagnostic claims ≥6 months apart, with a diagnosis code for PD during study period

(earliest diagnosis = index date)

N = 48,021

Figure S2: Proportion of PD Patient Cohort and Caregiving Spouse Cohort with Absence

Figure S3: Number of Absence Days Among the PD Patient Cohort and Caregiving Spouse Cohort

Figure S4: PD-related Drug Utilization for PD Patients and PD Spouses
